# Supplementary material for: Vibrio vulnificus Type 6 Secretion System 1 Contains Anti-Bacterial Properties
Source: PubMed Central journal article supplement (PMC5087951; doi:10.1371/journal.pone.0165500), 2016-10-31

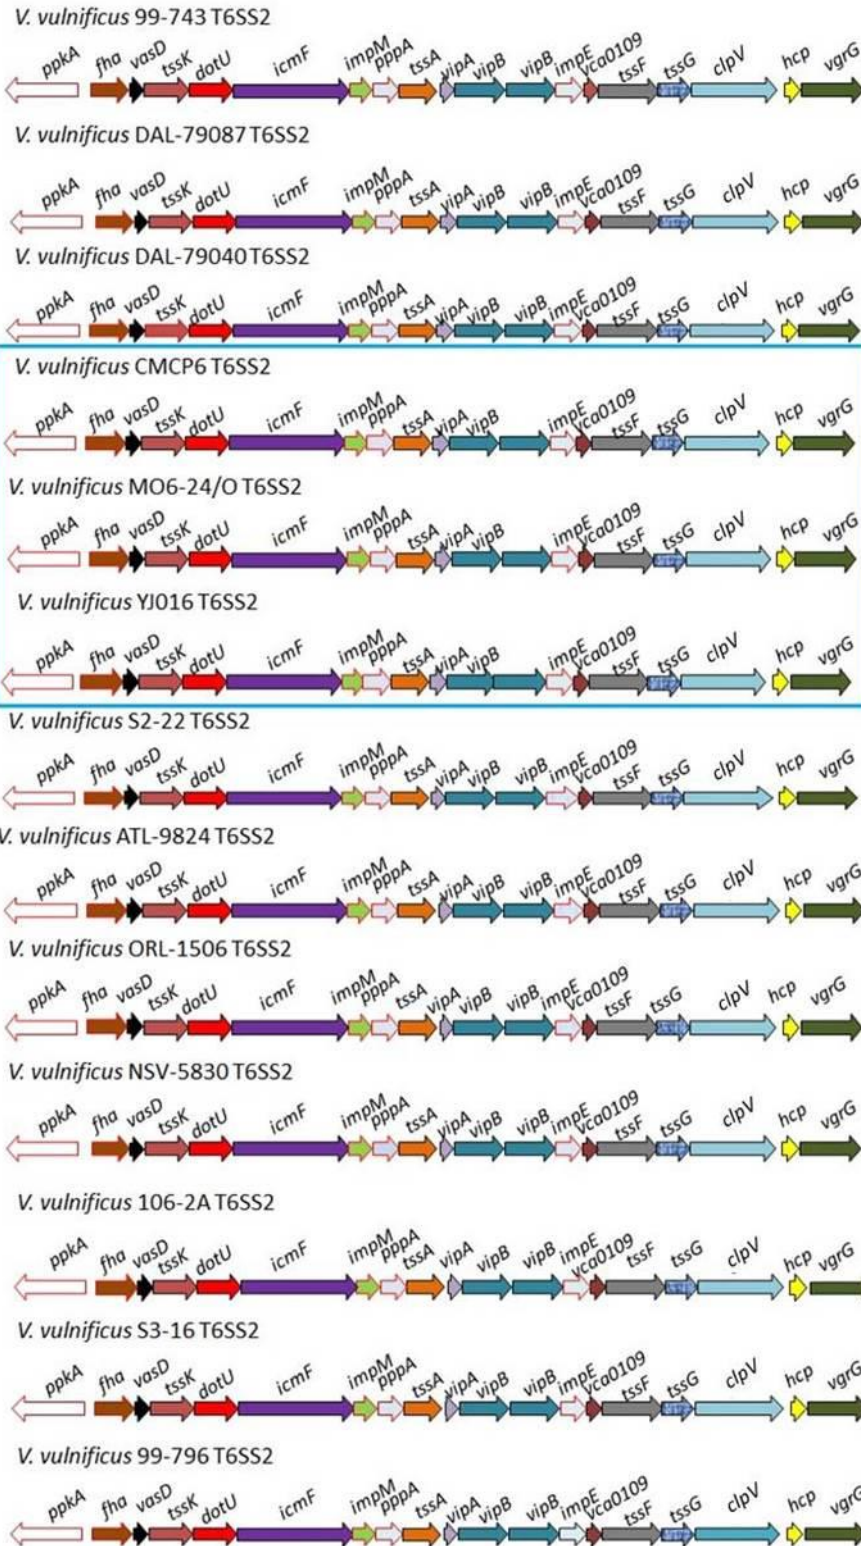

Supplement: pone.0165500.s001.pdf [file pone.0165500.s001.pdf]
