# Supplementary material for: Vibrio vulnificus Type 6 Secretion System 1 Contains Anti-Bacterial Properties
Source: PubMed Central journal article supplement (PMC5087951; doi:10.1371/journal.pone.0165500), 2016-10-31

*V. vulnificus* 106-2A T6SS1

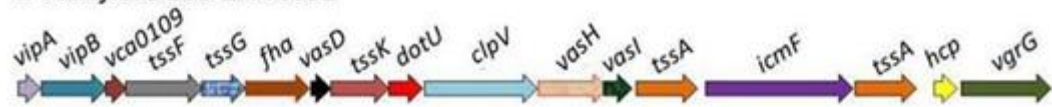

*V. vulnificus* S3-16 T6SS1

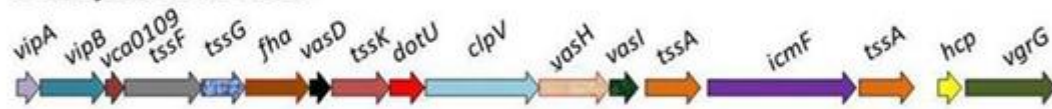

*V. vulnificus* 99-796 T6SS1

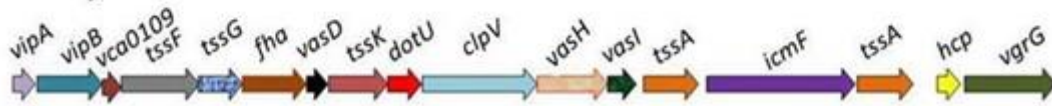

Supplement: pone.0165500.s002.pdf [file pone.0165500.s002.pdf]
